# Supplementary material
Source: Springer Nature journal article supplement (https://www.springerprofessional.de/resource/supplementary/13638_2013_904_MOESM1_ESM.pdf/11899172)
Supplement: MOESM1 [file 11899172]

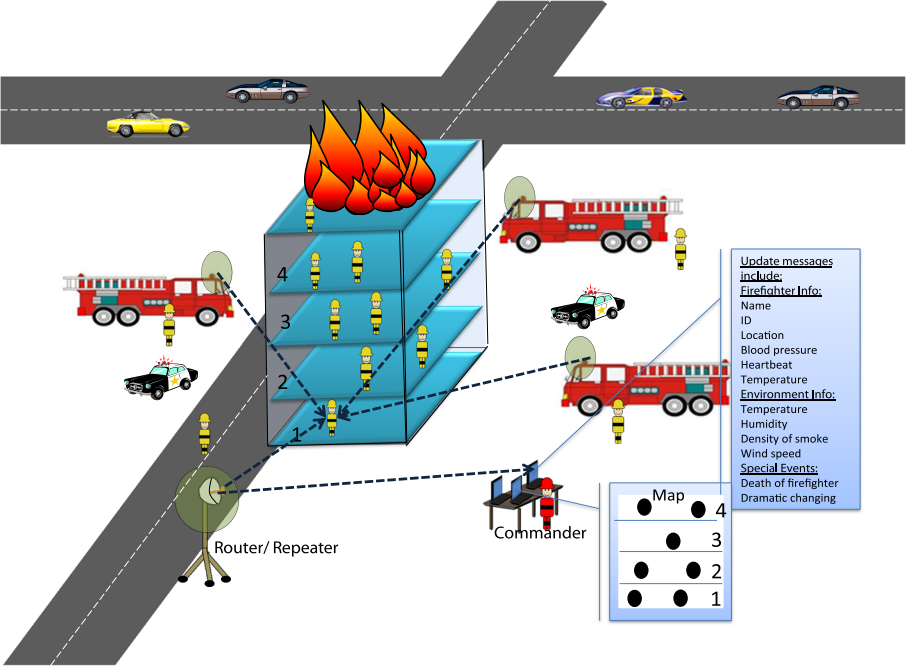

Update messages

include:

Firefighter Info:

Name

ID

Location

Blood pressure

Heartbeat

Temperature

Environment Info:

Temperature

Humidity

Density of smoke

Wind speed

Special Events:

Death of firefighter

Dramatic changing

Router/ Repeater

Commander

Map

● ● 4

● 3

● ● 2

● ● 1
